# Supplementary material for: Trends in attachment to a primary care provider in Ontario, 2008–2018: an interrupted time-series analysis
Source: PubMed Central journal article supplement — CMAJ Open. 2023 Sep 5;11(5):E809–19. doi: 10.9778/cmajo.20220167 (PMC10482493; doi:10.9778/cmajo.20220167), 2023-09-05

## INTRODUCTION

Strong primary care is fundamental to effective, efficient and more equitable health care systems.<sup>1-3</sup> Attachment to a regular primary care provider (PCP), defined as formal or informal patient access to the same individual or a group of primary care provider(s),<sup>4</sup> is associated with delivery of more preventive care, better chronic disease management and reduced hospitalizations.<sup>5-8</sup> Lack of attachment to primary care has been associated with higher mortality, emergency department visits, hospitalizations and readmissions, presentation to care with more advanced disease and poor patient experiences.<sup>9-11</sup> Lack of attachment has important equity implications, as well. People who are new immigrants, live with low income, were previously incarcerated, were prescribed opioid agonist treatment, or have comorbidities such as serious mental illness, are more likely to be unattached.<sup>12-18</sup>

Despite the importance of consistent access to primary care, 14.5% of Canadians age 12 years and older (about 4.6 million people) reported not having a regular primary care provider in 2019, with considerable variation in rates across Canada, ranging from 8% in Ontario to 27.8% in Quebec.<sup>19</sup> High numbers of unattached patients have important implications throughout health care systems, driving high utilization of care in low-continuity settings such as emergency departments (ED) and walk-in clinics, as well as poor follow up post-hospitalization and higher morbidity.<sup>9,10</sup>

Understanding longitudinal trends in primary care attachment is a key policy priority across Canada<sup>20</sup> and is critical for ensuring effective health system planning that reduces inequities for structurally marginalized groups. There are many drivers of attachment including recruitment and retention of family physicians. Professional organizations have increasingly called for alternate payments and expansion of team-based care as factors that can incentivize physicians to practice family medicine.<sup>21</sup> We sought to examine trends in attachment to primary care in Ontario, Canada, including changes temporally related to restricted access to alternate payment models starting in early 2015, and to examine these trends through an equity lens.

## METHODS

### Context and Setting

The study was set in Ontario, Canada's largest province with a population of 14,789,778 million, in which medically necessary physician and hospital services are government funded for permanent residents without any direct charges to patients. Family physician and nurse practitioner visits are fully insured and free at the point of care. In 2002, following a period of declining policy support for primary care, Ontario increased investment and implemented broad voluntary reforms in the delivery and payment of primary care aimed at improving access, quality of care and physician retention.<sup>22</sup> Under the reforms, most physicians shifted from exclusive fee-for-service (FFS) remuneration to new models that incorporated blended capitation payments, patient enrolment, pay for performance and, in some cases, access to nonphysician health care professionals. Several models of care in Ontario require patient enrollment, including models in which physicians are compensated by blended capitation (monthly age and sex adjusted payments and a small proportion of fee for service payments), and those paid by fee for

1  
2  
3 service. Since early 2015, the Ontario government has limited new physicians entering  
4 capitation-based models to 20 new positions in Family Health Organization and Family Health  
5 Network compensation models in areas of high physician need only, or replacement of  
6 physicians in existing teams.<sup>23</sup>  
7

## 8 Design, Setting and Participants

9  
10 We conducted a repeated cross-sectional study using population level administrative data housed  
11 at ICES. Study participants included all Ontario residents with a health card number in each year  
12 from April 1, 2008 to Mar 31, 2019.  
13  
14

## 15 Data sources and linkages

16  
17 We used linked administrative datasets to examine trends in attachment at the patient level. The  
18 datasets were linked using unique encoded identifiers and analyzed at ICES. ICES is an  
19 independent, non-profit research institute whose legal status under Ontario's health information  
20 privacy law allows it to collect and analyze health care and demographic data, without consent,  
21 for health system evaluation and improvement. The use of the data in this project is authorized  
22 under section 45 of Ontario's Personal Health Information Protection Act (PHIPA) and does not  
23 require review by a Research Ethics Board.  
24  
25

26 We linked a the following databases: Registered Persons Database (a health insurance registry),  
27 the Corporate Provider Database (a registry of providers and groups eligible to bill OHIP for  
28 their services), the Client Agency Program Enrolment database (identifies patients enrolled in  
29 different primary care models over time), and the Community Health Centre database (which  
30 lists patients receiving health services at Community Health Centres, a model of care serving  
31 vulnerable Ontarians in which physicians are salaried). We assessed emergency department (ED)  
32 visits using the National Ambulatory Care Reporting System and hospitalizations using the  
33 Discharge Abstracts Database. We used the Johns Hopkins Adjusted Clinical Groups System  
34 Version 10 to capture morbidity according to Aggregated Diagnostic Groups.  
35  
36  
37

## 38 Variable definition

### 39 Outcome

40  
41  
42 The dependent variable was the percentage of eligible Ontario residents attached to a primary  
43 care physician, measured with administrative data using an algorithm developed and validated by  
44 our group.<sup>24</sup> The algorithm involved hierarchical assignment of attachment. First, patients  
45 enrolled to a Patient Enrollment Model (PEM) were considered attached. Next, patients receiving  
46 clinical care at a Community Health Centre were included as attached. Next, patients were  
47 considered as attached if they received the majority of their primary care over the preceding 2-  
48 year period from a PCP with greater than 10% physician-level continuity of care. Continuity of  
49 care was a visit-based measure of the proportion of an individual PCP visits over all the  
50 physician's visits seen over a two-year time period, and as determined with a numerator of  
51 patients virtually rostered to a PCP divided by the denominator of all unique patients the same  
52 PCP had seen over two years. Finally, consistent with a previously validated algorithm used to  
53 examine pediatric health services access,<sup>25</sup> children who were virtually rostered with a primary  
54  
55  
56  
57  
58  
59  
60

1  
2  
3 care pediatrician were also considered attached.<sup>24</sup> All others were considered uncertainly  
4 attached.  
5

## 6 Covariates 7

8 We derived age, sex, rurality and immigration status from the Registered Persons Database. We  
9 measured rurality using the postal code and the Rurality Index for Ontario, using the following  
10 categories: urban (score 0–9), suburban (score 10–39) and rural (score  $\geq 40$ ).<sup>26</sup> We used postal  
11 code and the Ontario Marginalization Index to derive participants' Material Deprivation and  
12 Residential Instability quintiles. The Ontario Marginalization Index is an area-based index that  
13 seeks to understand differences in health between population groups or between geographical  
14 areas.<sup>27</sup> We examined two of the included dimensions. Material deprivation includes indicators  
15 such as the proportion of the adult population who are lone parent families, receiving  
16 government transfer payments, low income, unemployed or have no high school diploma.  
17 Residential instability is a measure of area-level concentrations of people who experience high  
18 rates of family or housing instability and includes (among others) indicators of the proportion of  
19 people living alone, dwellings that are apartment buildings, and the proportion of the population  
20 who have moved in the past 5 years. We identified recent immigrants using a proxy measure that  
21 identifies people with first time health care coverage in Ontario, the majority of whom are recent  
22 immigrants to Canada.  
23  
24  
25  
26

## 27 Statistical Analysis 28

29 We began by identifying attached and uncertainly attached populations for each year between  
30 2008/09 and 2018/19 and their characteristics and rates of ED visits and hospitalizations. We  
31 examined changed in attachment over time, stratified by demographic group. Next, we used  
32 logistic regression models to examine the association between patient characteristics and patient  
33 attachment in 2018/19, adjusting for sex, age, rurality, comorbidity, resource utilization, recent  
34 immigration, material deprivation and residential instability. Because univariate models differed  
35 for both sexes by age, we tested for and identified an interaction between age and sex. We next  
36 developed stratified multivariate models for males and females of factors associated with  
37 attachment in 2018. Tolerance and variance inflation factors were consistent with lack of  
38 multicollinearity in the multivariate models.  
39  
40  
41

42 To assess the association with policy changes restricting family physician entry to alternate  
43 funding models in 2015, we used segmented piece-wise linear regression models with correlated  
44 residuals including time, policy change in 2015 and time-after policy change as predictors. We  
45 tested for autocorrelation and reported the most parsimonious model.  
46  
47

## 48 RESULTS 49

50 In 2008, 80.5% of Ontario residents (n=10,352,385) were attached to a primary care provider.  
51 Attachment increased over the study period to 88.9% of the population in 2018 (n=12,537,172),  
52 and the increased attachment exceeded the rate of population growth. The characteristics of the  
53 attached and general population are summarized at three key time points in the study (2008, 2014  
54 and 2018) in Table 1. Proportionately fewer males were attached both at baseline (77.4% vs  
55  
56  
57  
58  
59  
60

83.5% females) and in 2018 (86.9% vs 90.9 % females). Young adults (aged 19-34 years) had lower rates of attachment compared with all other age groups at baseline (71.5%) and study end (83.6%). Children and youth experienced the highest rates of attachment, followed by older adults. Attachment was lower among individuals who were rural dwelling individuals, had low comorbidity, highest residential instability, material deprivation and wererecent immigrants. About 25% of uncertainly attached individuals visited the ED, which remained stable throughout the study period. Hospitalization rates decreased from 12.1% in 2008 to 9.8% in 2018. Health system utilization was higher for attached patients, of whom about 37% visited the emergency department and 20-22% were hospitalized in a given year.

Attachment increased over the study period overall and for all demographic groups, with the largest relative gains seen for new immigrants, 19-34 year olds, and those with low comorbidity. Overall gains were seen between 2008-2014, after which attachment plateaued (Figure 1). Gaps between some groups narrowed from 2008-2014, after which the rate of change slowed overall (Figure 2). The disparity in attachment for recent immigrants continued to close after 2014, though more slowly than before 2014. Rapid gains were seen for those with low comorbidity until 2014, after which the rate was essentially unchanged. Limited reduction in disparities by material deprivation was observed between 2008 and 2014, but the gap continued to close throughout the study period.

We used sex stratified univariate (Table 2) and multivariate models for the final study year to further examine predictors of attachment (Table 3). Compared with adults aged 50-64 years, children and youth were most likely to be attached (aOR males 2.70 [2.67, 2.73], females 2.40 [2.37, 2.43]. Adults aged 19-34 years were least likely (aOR males 0.86 (0.86, 0.87), females 0.64 [0.63, 0.64]) to be attached. Older adults were more likely to be attached, with higher point estimates for males than females. For all ages, males were more likely to be attached except ages 35-49 years. Both males and females with moderate to high comorbidity were two to three times more likely to be attached, with higher odds of attachment for males. Those with moderate to high health care utilization had 4-7 times greater odds of attachment, but in this case the odds were higher for females than males.

However, we also identified lower odds of attachment for people who recently immigrated to Ontario (aOR males 0.56 [0.56, 0.56], females 0.50 [0.50, 0.51]). In addition, lower odds of attachment was observed for those with higher instability [aOR highest instability males 0.67 (0.67, 0.68), females 0.72 (0.71, 0.73)] and higher deprivation [aOR highest deprivation males 0.75 (0.75, 0.76), females 0.80 (0.79, 0.80)]. Both marginalization measures followed a gradient along instability and deprivation marginalization quintiles, with lower odds of attachment for more vulnerable males than females.

We examined changing trends using segmented regression models with correlated residuals. There was no evidence of either first or second-order autocorrelation. There was a significant trend before 2014 (slope=1.47;  $p<0.0001$ ), which flattened after 2014 (slope =0.13,  $p=0.16$ ), indicating that the line is flat.

## INTERPRETATION

1  
2  
3 Our study examined primary care attachment longitudinally in Ontario and found that the crude  
4 number of attached persons increased by 21.1% over the study period, a rate in excess of  
5 population growth (9.6%). Growth in attachment was impressive until 2014 after which it was  
6 stagnant. The most substantial gains were observed for people with low comorbidity, males,  
7 young adults and new immigrants.  
8  
9

10 Attachment increased rapidly during the period of introduction and growth of a broad array of  
11 payment and enrollment reforms, including new primary care models of care based on patient  
12 enrollment and blended capitation payment. Attachment plateaued around the time that the  
13 Ontario government restricted entry to blended capitation models, many of which were also  
14 interprofessional teams.<sup>28</sup> Beginning in early 2015, expansion of alternate models was limited to  
15 physicians practicing in underserved areas or addressing attrition within existing teams. These  
16 results provide a strong rationale for investment in reforms in primary care funding and  
17 expansion of interdisciplinary teams. It is noteworthy that expansion of primary care alternate  
18 models was included in the recently approved Ontario Physician Services Agreement.<sup>29</sup>  
19  
20  
21

22 Importantly, a substantial proportion of uncertainly attached people had frequent contact with the  
23 health system, including about 25% of uncertainly attached patients had an ED visit and 10-12%  
24 were hospitalized in a given year. Each of these encounters represents an opportunity for  
25 attachment, which will require appropriate policy innovations.  
26

27 While equity in enrollment improved overall during the study period, important gaps remained  
28 for specific groups. Inequities were persistent for new immigrants and for people living with  
29 economic and residential insecurity, with greater gaps observed for men than women. Targeted  
30 interventions are needed to reach these communities, who have not benefited as much from  
31 structural and payment reforms in primary care.<sup>30</sup>  
32  
33

34 In other jurisdictions, attachment has either decreased or remained fixed over time. In the United  
35 States, attachment among adults decreased from 77% (95% CI, 76%-78%) in 2002 to 75% (95%  
36 CI, 74%-76%) in 2015 (aOR, 0.90 [95% CI, 0.82-0.98]).<sup>31</sup> Another study examining attachment  
37 in older US adults reported reduced attachment from 94.2% in 2010 to 91.0% in 2016  
38 (p<0.0001).<sup>32</sup> Both studies demonstrated lower attachment in males, people with lower incomes,  
39 or whose race/ethnicity was Black or Latino, even after controlling for insurance status. In New  
40 Zealand, 93-95% of the population was enrolled in primary care from 2015-2019, with lower  
41 attachment among Maori people and those living with higher deprivation.<sup>14</sup>  
42  
43  
44

45 Nationally, Ontario has the lowest proportion of residents who are unattached to primary care,  
46 and may serve as a model for other provinces. Survey data from the Canadian Community  
47 Health Survey demonstrate that Quebec and the Western provinces fare considerably more  
48 poorly, and nation-wide estimates suggest that over 4.5 million Canadians do not have access to  
49 a regular primary care provider.<sup>19</sup> Some provinces have established centralized wait lists to  
50 improve attachment.<sup>20</sup> Cross-sectional studies of the effectiveness of centralized wait lists have  
51 demonstrated increased attachment; however, people with fewer comorbid conditions appeared  
52 to be preferentially enrolled and demand exceeds primary care capacity.<sup>33,34</sup> Longitudinal  
53 analyses of centralized waitlists are underway. Additional measures taken across Canada include  
54  
55  
56  
57  
58  
59  
60

1  
2  
3 payment reforms, implementation of interdisciplinary teams, attachment fee codes including  
4 specific fee codes for attachments of complex patients, expansion of nurse practitioner roles, and  
5 geographic attachment in some areas.<sup>35</sup> Our work underscores the importance of payment reform  
6 and interdisciplinary team models for supporting attachment.<sup>36</sup>  
7

8  
9 Although the situation is considerably better in Ontario, health human resource trends suggest  
10 concerning future trends. About 14.4% of Ontario family physicians are age 65 years and older,<sup>37</sup>  
11 and the mean age of retirement is 70.5 years.<sup>38</sup> Increased healthcare provider pressures  
12 experienced during the COVID-19 pandemic have accelerated retirement plans of older  
13 physicians,<sup>39</sup> and almost one in five Toronto family physicians reports considering closing their  
14 practice in the next five years.<sup>40</sup> In addition, comprehensiveness of practice has been decreasing  
15 among newly graduated physicians. While maximum patient panel size tends to occur mid-  
16 career,<sup>38</sup> overall numbers of patient panel sizes are reduced in all career phases and practice  
17 patterns are shifting away from comprehensive community based primary care practices, to  
18 practices which include more focused practices, and roles in hospital and emergency  
19 departments.<sup>41</sup> These trends suggest upcoming health human resource problems, which could  
20 substantially erode the gains observed in our study.  
21  
22  
23

## 24 **LIMITATIONS**

25  
26 Our study has some limitations. Health administrative databases are unable to track services  
27 provided by nurse practitioners, except in Community Health Centres. In Ontario, 25 nurse  
28 practitioner-led clinics serve approximately 100,000 patients, largely located in rural and remote  
29 settings.<sup>42</sup> While they play an important role in these communities, the volume of service is  
30 unlikely to change the overall trends we found. In addition, the attachment algorithm may have  
31 misclassified some people. Our group previously validated the algorithm against survey  
32 responses. We demonstrated very high sensitivity and positive predictive value of the algorithm,  
33 but more modest specificity, meaning that some uncertainly attached individuals may have had  
34 access to primary care. In addition, measures of income and residential stability were all  
35 determined at a neighbourhood level using census data. Area level measures are economical and  
36 widely used to examine population level differences, but are limited by their inability to capture  
37 variation within neighbourhoods.<sup>43</sup>  
38  
39  
40

## 41 **CONCLUSION**

42  
43 Primary care attachment in Ontario increased faster than the overall population growth rate  
44 between 2008 and 2014, but was stagnant after 2014. Lack of ongoing progress followed reduced  
45 physician entry to alternate funding and interdisciplinary team models. While disparities in  
46 attachment narrowed for many groups, persistent gaps remain for immigrants and lower income  
47 Ontarians. Targeted interventions are needed to address these persistent gaps. Upcoming health  
48 human resource trends may erode the gains seen.  
49  
50  
51  
52  
53  
54  
55  
56  
57  
58  
59  
60

## REFERENCES

1. Starfield B, Shi L, Macinko J. Contribution of primary care to health systems and health. *Milbank Q.* 2005;83doi:10.1111/j.1468-0009.2005.00409.x
2. OECD. *Realising the Potential of Primary Health Care.* 2020.
3. Promotion OAfHPa. *Healthy Babies Healthy Children process implementation evaluation: executive summary.* 2014. Accessed July 29, 2016. [http://www.publichealthontario.ca/en/eRepository/HBHC\\_Executive\\_Summary\\_EN\\_2014.pdf](http://www.publichealthontario.ca/en/eRepository/HBHC_Executive_Summary_EN_2014.pdf)
4. Marshall EG, Breton M, Green M, et al. CUP study: protocol for a comparative analysis of centralised waitlist effectiveness, policies and innovations for connecting unattached patients to primary care providers. *BMJ Open.* 2022;12(3):e049686. doi:10.1136/bmjopen-2021-049686
5. Rosano A, Loha CA, Falvo R, et al. The relationship between avoidable hospitalization and accessibility to primary care: a systematic review. *European Journal of Public Health.* 2012;23(3):356-360. doi:10.1093/eurpub/cks053
6. Wolters RJ, Braspenning JCC, Wensing M. Impact of primary care on hospital admission rates for diabetes patients: A systematic review. *Diabetes Research and Clinical Practice.* 2017/07/01/ 2017;129:182-196. doi:<https://doi.org/10.1016/j.diabres.2017.05.001>
7. DeVoe JE, Fryer GE, Phillips R, Green L. Receipt of preventive care among adults: insurance status and usual source of care. *American journal of public health.* 2003;93(5):786-791. doi:10.2105/ajph.93.5.786
8. McIsaac WJ, Fuller-Thomson E, Talbot Y. Does having regular care by a family physician improve preventive care? *Canadian Family Physician.* 2001;47(1):70-76.
9. Peel A, Gutmanis I, Bon T. Disparities in health outcomes among seniors without a family physician in the North West Local Health Integration Network: a retrospective cohort study. *CMAJ Open.* 2019;7(1):E94-E100. doi:10.9778/cmajo.20180004
10. Duero Posada JG, Moayedi Y, Zhou L, et al. Clustered Emergency Room Visits Following an Acute Heart Failure Admission: A Population-Based Study. *J Am Heart Assoc.* Mar 27 2018;7(7):27. doi:<https://dx.doi.org/10.1161/JAHA.117.007569>
11. Crooks VA, Agarwal G, Harrison A. Chronically ill Canadians' experiences of being unattached to a family doctor: a qualitative study of marginalized patients in British Columbia. Research Support, Non-U.S. Gov't. *BMC Fam Pract.* Jul 16 2012;13:69. doi:<https://dx.doi.org/10.1186/1471-2296-13-69>
12. Hay C, Pacey M, Bains N, Ardal S. Understanding the Unattached Population in Ontario: Evidence from the Primary Care Access Survey (PCAS). *Healthcare Policy = Politiques de sante.* Nov 2010;6(2):33-47.
13. Batista R, Pottie KC, Dahrouge S, et al. Impact of health care reform on enrolment of immigrants in primary care in Ontario, Canada. *Fam Pract.* Jul 31 2019;36(4):445-451. doi:10.1093/fampra/cmz082
14. Irurzun-Lopez M, Jeffreys M, Cumming J. The enrolment gap: who is not enrolling with primary health organizations in Aotearoa New Zealand and what are the implications? An exploration of 2015–2019 administrative data. *Intern.* 2021/04/06 2021;20(1):93. doi:10.1186/s12939-021-01423-4
15. Talbot Y, Fuller-Thomson E, Tudiver F, Habib Y, McIsaac WJ. Canadians without regular medical doctors. Who are they? *Canadian family physician Medecin de famille canadien.* Jan 2001;47:58-64.

16. Bradford DW, Kim MM, Braxton LE, Marx CE, Butterfield M, Elbogen EB. Access to Medical Care Among Persons with Psychotic and Major Affective Disorders. *Psychiatric Services*. 2008;59:847-852.
17. Kouyoumdjian F, Kim M, Kiran T, et al. Attachment to primary care and team-based primary care. *Retrospective cohort study of people who experienced imprisonment in Ontario*. 2019;65(10):e433-e442.
18. Spithoff S, Kiran T, Khuu W, et al. Quality of primary care among individuals receiving treatment for opioid use disorder. *Canadian family physician Medecin de famille canadien*. May 2019;65(5):343-351.
19. Statistics Canada. Primary health care providers, 2019. Statistics Canada,. Accessed Jan. 24, 2022, <https://www150.statcan.gc.ca/n1/en/pub/82-625-x/2020001/article/00004-eng.pdf?st=TYoGj5oC>
20. McKay M, Lavergne MR, Lea AP, et al. Government policies targeting primary care physician practice from 1998-2018 in three Canadian provinces: A jurisdictional scan. *Health Policy*. 2022/03/17/ 2022;doi:<https://doi.org/10.1016/j.healthpol.2022.03.006>
21. The College of Family Physicians of Canada. *Strengthening Health Care—Access Done Right*. 2021. [https://www.cfpc.ca/CFPC/media/Resources/Health-Care-Delivery/Access-Done-Right\\_ENG\\_Final.pdf](https://www.cfpc.ca/CFPC/media/Resources/Health-Care-Delivery/Access-Done-Right_ENG_Final.pdf)
22. Hutchison B, Glazier RH. Ontario's Primary Care Reforms Have Transformed the Local Care Landscape, But A Plan Is Needed For Ongoing Improvement. *Health Affairs*. 2013;32(4):695-703.
23. Ontario Ministry of Health and Long-Term Care. Areas of High Physician Need. Accessed April 30 2022, <https://www.health.gov.on.ca/en/pro/programs/highneed/>
24. Jaakkimainen L, Bayoumi I, Glazier R, et al. Development and validation of an algorithm using health administrative data to define patient attachment to primary care providers. *Journal of Health Organization and Management*. 2021;doi:10.1108/JHOM-05-2020-0171
25. Guttman A, Shipman SA, Lam K, Goodman DC, Stukel TA. Primary Care Physician Supply and Children's Health Care Use, Access, and Outcomes: Findings From Canada. *Pediatrics*. 2010;125(6):1119-1126. doi:10.1542/peds.2009-2821
26. Kralji B. *Measuring Rurality- RIO2008 BASIC: Methodology and Results*. 2009. Accessed Feb. 26, 2022. [https://docplayer.net/91599736-Measuring-rurality-rio2008\\_basic-methodology-and-results.html](https://docplayer.net/91599736-Measuring-rurality-rio2008_basic-methodology-and-results.html)
27. Matheson FI, Van Ingen T. *2016 Ontario marginalization index: user guide*. 2016. Accessed Jan. 12 2022. <https://www.publichealthontario.ca/-/media/documents/O/2017/on-marg-userguide.pdf>
28. Grant K. Ontario's curious shift away from family health teams. *The Globe and Mail*. Feb. 15 2015. Accessed Feb. 3 2022. <https://www.theglobeandmail.com/life/health-and-fitness/health/ontarios-curious-shift-away-from-family-health-teams/article22989363/#:~:text=The%20province%20decided%20to%20limit,represents%20the%20province's%2028%2C000%20doctors.>
29. Ontario Medical Association. <https://www.oma.org/newsroom/news/2022/march/ontarios-doctors-ratify-new-three-year-agreement-with-province/>
30. Kiran T, Kopp A, Glazier RH. Those Left Behind From Voluntary Medical Home Reforms in Ontario, Canada. *Annals of Family Medicine*. 2016;14:517-525.



- 1  
2  
3 31. Levine DM, Linder JA, Landon BE. Characteristics of Americans With Primary Care and  
4 Changes Over Time, 2002-2015. *JAMA Internal Medicine*. 2020;180(3):463-466.  
5 doi:10.1001/jamainternmed.2019.6282  
6  
7 32. Ganguli I, McGlave C, Rosenthal MB. National Trends and Outcomes Associated With  
8 Presence and Type of Usual Clinician Among Older Adults With Multimorbidity. *JAMA*  
9 *Network Open*. 2021;4(11):e2134798-e2134798. doi:10.1001/jamanetworkopen.2021.34798  
10  
11 33. Breton M, Smithman MA, Brousselle A, et al. Assessing the performance of centralized  
12 waiting lists for patients without a regular family physician using clinical-administrative data.  
13 Research Support, Non-U.S. Gov't. *BMC Fam Pract*. 01 05 2017;18(1):1.  
14 doi:<https://dx.doi.org/10.1186/s12875-016-0573-1>  
15  
16 34. Breton M, Brousselle A, Boivin A, Roberge D, Pineault R, Berbiche D. Who gets a  
17 family physician through centralized waiting lists? *BMC Fam Pract*. Feb 5 2015;16:10.  
18 doi:10.1186/s12875-014-0220-7  
19  
20 35. Peckham S, Hutchison B. Developing primary care: the contribution of primary care  
21 research networks. *Healthcare Policy = Politiques de sante*. Nov 2012;8(2):56-70.  
22  
23 36. Mitra G, Grudniewicz A, Lavergne MR, Fernandez R, Scott I. Alternative payment  
24 models. *A path forward*. 2021;67(11):805-807. doi:10.46747/cfp.6711805  
25  
26 37. Canadian Institute for Health Information. *Health Workforce in Canada, 2020 - Quick*  
27 *Stats*. 2021. Accessed Feb. 3 2022. <https://www.cihi.ca/en/quick-stats>  
28  
29 38. Simkin S, Dahrouge S, Bourgeault IL. End-of-career practice patterns of primary care  
30 physicians in Ontario. *Canadian family physician Medecin de famille canadien*.  
31 2019;65(5):e221-e230.  
32  
33 39. Kiran T, Green ME, Wu FC, et al. Did the COVID-19 pandemic result in more family  
34 physicians stopping practice? Results from Ontario, Canada. *medRxiv*.  
35 2021:2021.09.21.21263891. doi:10.1101/2021.09.21.21263891  
36  
37 40. Kiran T, Wang R, Handford C, et al. Keeping doors open: A cross-sectional survey of  
38 family physician practice patterns during COVID-19, needs, and intentions. *medRxiv*.  
39 2021:2021.12.20.21267918. doi:10.1101/2021.12.20.21267918  
40  
41 41. Hedden L, Banihosseini S, Strydom N, McCracken R. Modern work patterns of “classic”  
42 versus millennial family doctors and their effect on workforce planning for community-based  
43 primary care: a cross-sectional survey. *Human Resources for Health*. 2020/09/21 2020;18(1):67.  
44 doi:10.1186/s12960-020-00508-5  
45  
46 42. Nurse Practitioner Led Clinic Association, Nurse Practitioner Association of Ontario.  
47 *Nurse practitioner led clinics in Ontario: An Overview of the Nurse Practitioner Led Clinic*  
48 *model and recommendations for further development*. 2019. Accessed Feb. 26, 2022.  
49 <https://npao.org/wp-content/uploads/2019/11/NPLC-Overview-Document-1.pdf>  
50  
51 43. Buajitti E, Chiodo S, Rosella LC. Agreement between area- and individual-level income  
52 measures in a population-based cohort: Implications for population health research. *SSM -*  
53 *Population Health*. 2020/04/01/ 2020;10:100553.  
54 doi:<https://doi.org/10.1016/j.ssmph.2020.100553>  
55  
56  
57  
58  
59  
60

**Table 1 Patient demographic characteristics 2008-2018**

| Variable                 | Label                      | 2008       |         |            | 2014       |         |            | 2018       |         |            | Difference 2018- 2008       |                     |
|--------------------------|----------------------------|------------|---------|------------|------------|---------|------------|------------|---------|------------|-----------------------------|---------------------|
|                          |                            | Attached   |         | Total      | Attached   |         | Total      | Attached   |         | Total      | Absolute percent difference | Relative difference |
|                          |                            | N          | Percent | N          | N          | Percent | N          | N          | Percent | N          |                             |                     |
| <b>OVERALL</b>           |                            | 10,352,385 | 80.5    | 12,863,036 | 11,972,070 | 88.1    | 13,371,946 | 12,537,172 | 88.9    | 14,096,100 | 8.4                         | 10.4                |
| <b>Sex</b>               | Male                       | 4,902,611  | 77.4    | 6,336,768  | 5,731,257  | 86.3    | 6,641,622  | 6,021,636  | 86.9    | 6,928,191  | 9.5                         | 12.3                |
|                          | Female                     | 5,449,774  | 83.5    | 6,526,268  | 6,240,813  | 90.6    | 6,886,323  | 6,515,536  | 90.9    | 7,167,909  | 7.4                         | 8.9                 |
| <b>Age category</b>      | <19                        | 2,731,580  | 91.6    | 2,983,281  | 2,707,855  | 93.7    | 2,889,839  | 2,688,182  | 93.6    | 2,872,967  | 2                           | 2.2                 |
|                          | 19-34                      | 1,941,613  | 71.5    | 2,713,735  | 2,387,721  | 82.8    | 2,883,509  | 2,491,779  | 83.6    | 2,979,286  | 12.1                        | 16.9                |
|                          | 35-49                      | 2,345,430  | 76.3    | 3,073,175  | 2,468,965  | 86.4    | 2,856,163  | 2,471,632  | 86.7    | 2,850,490  | 10.4                        | 13.6                |
|                          | 50-64                      | 1,947,237  | 80.2    | 2,429,426  | 2,536,267  | 89.0    | 2,849,501  | 2,708,959  | 89.6    | 3,024,685  | 9.4                         | 11.7                |
|                          | 65-79                      | 1,038,837  | 83.3    | 1,246,586  | 1,402,343  | 91.3    | 1,536,482  | 1,646,130  | 91.9    | 1,791,552  | 8.6                         | 10.3                |
|                          | 80+                        | 347,688    | 83.4    | 416,833    | 468,919    | 91.5    | 512,451    | 530,490    | 91.9    | 577,120    | 8.5                         | 10.2                |
| <b>RIO index</b>         | Urban (0-9)                | 7,397,897  | 79.8    | 9,275,239  | 8,692,101  | 88.2    | 9,855,613  | 9,144,956  | 88.8    | 10,302,737 | 9                           | 11.3                |
|                          | Small town (10-39)         | 2,116,215  | 84.8    | 2,496,232  | 2,345,182  | 90.9    | 2,579,570  | 2,434,140  | 90.9    | 2,676,741  | 6.1                         | 7.2                 |
|                          | Rural (40+)                | 765,279    | 78.2    | 978,283    | 857,518    | 87.4    | 980,713    | 874,527    | 87.9    | 994,441    | 9.7                         | 12.4                |
|                          | Missing                    | 72,994     | 64.4    | 113,282    | 77,269     | 69.0    | 112,049    | 83,549     | 68.4    | 122,181    | 4                           | 6.2                 |
| <b>Comorbidity (ADG)</b> | No/low comorbidity (0-4)   | 4,977,558  | 73.3    | 6,791,348  | 6,068,182  | 83.8    | 7,245,411  | 6,237,180  | 84      | 7,427,923  | 10.7                        | 14.6                |
|                          | Moderate comorbidity (5-9) | 4,272,094  | 88.7    | 4,816,930  | 4,625,684  | 94.0    | 4,920,446  | 4,859,500  | 94.5    | 5,142,000  | 5.8                         | 6.5                 |

|                                                          |                             |           |      |           |           |      |            |            |      |            |      |      |
|----------------------------------------------------------|-----------------------------|-----------|------|-----------|-----------|------|------------|------------|------|------------|------|------|
|                                                          | High comorbidity (10+)      | 1,102,733 | 87.9 | 1,254,758 | 1,278,204 | 93.8 | 1,362,088  | 1,440,492  | 94.4 | 1,526,177  | 6.5  | 7.4  |
|                                                          |                             |           |      |           |           |      |            |            |      |            |      |      |
| <b>Morbidity (RUB)</b>                                   | Non-user/healthy user (0-1) | 1,026,238 | 48.4 | 2,118,830 | 1,472,205 | 67.5 | 2,182,561  | 1,539,471  | 67.3 | 2,286,918  | 18.9 | 39.1 |
|                                                          | Low morbidity (2)           | 2,218,280 | 84.8 | 2,616,422 | 2,457,443 | 90.6 | 2,711,249  | 2,454,723  | 91   | 2,696,051  | 6.2  | 7.3  |
|                                                          | Moderate morbidity (3)      | 5,248,159 | 87.5 | 5,999,986 | 5,818,534 | 93.0 | 6,254,661  | 6,042,110  | 93.6 | 6,452,615  | 6.1  | 7.0  |
|                                                          | High morbidity (4+)         | 1,859,708 | 87.4 | 2,127,798 | 2,223,888 | 93.5 | 2,379,474  | 2,500,868  | 94   | 2,660,516  | 6.6  | 7.6  |
|                                                          |                             |           |      |           |           |      |            |            |      |            |      |      |
| <b>Recent immigrant</b>                                  | No                          | 7,920,620 | 80.1 | 9,882,644 | 9,466,538 | 88.6 | 10,682,618 | 10,045,967 | 89   | 11,287,661 | 8.9  | 11.1 |
|                                                          | Yes                         | 924,122   | 67.8 | 1,363,337 | 970,576   | 79.8 | 1,216,706  | 975,069    | 81.4 | 1,198,483  | 13.6 | 20.1 |
|                                                          |                             |           |      |           |           |      |            |            |      |            |      |      |
| <b>Marginalization: Residential Instability quintile</b> | a. Lowest instability (1)   | 2,245,592 | 83.8 | 2,678,771 | 2,746,156 | 90.9 | 3,019,913  | 2,858,167  | 91.3 | 3,130,363  | 7.5  | 9.0  |
|                                                          | b. 2                        | 2,091,120 | 83.3 | 2,511,738 | 2,311,451 | 90.4 | 2,556,842  | 2,412,349  | 90.6 | 2,661,479  | 7.3  | 8.8  |
|                                                          | c. 3                        | 1,917,243 | 82.1 | 2,335,277 | 2,142,267 | 89.5 | 2,393,882  | 2,280,527  | 89.9 | 2,535,978  | 7.8  | 9.5  |
|                                                          | d. 4                        | 1,893,272 | 79.6 | 2,377,687 | 2,136,073 | 88.1 | 2,425,107  | 2,213,598  | 88.5 | 2,500,126  | 8.9  | 11.2 |
|                                                          | e. Highest instability (5)  | 2,087,599 | 75.1 | 2,780,816 | 2,524,839 | 84.9 | 2,972,369  | 2,671,039  | 85.5 | 3,123,843  | 10.4 | 13.9 |
|                                                          |                             |           |      |           |           |      |            |            |      |            |      |      |

|    |                                                                   |                            |           |      |           |           |      |           |           |      |           |     |      |
|----|-------------------------------------------------------------------|----------------------------|-----------|------|-----------|-----------|------|-----------|-----------|------|-----------|-----|------|
| 1  | <b>Marginalization:<br/>Material<br/>Deprivation<br/>quintile</b> | a. Lowest deprivation (1)  | 2,381,696 | 83.4 | 2,857,306 | 2,623,982 | 90.2 | 2,910,272 | 2,893,438 | 90.4 | 3,201,555 | 7.0 | 8.4  |
| 2  |                                                                   | b. 2                       | 2,099,290 | 82.5 | 2,545,256 | 2,518,205 | 90.2 | 2,791,259 | 2,663,134 | 90.5 | 2,942,539 | 8   | 9.7  |
| 3  |                                                                   | c. 3                       | 1,982,173 | 81   | 2,447,798 | 2,297,416 | 89.1 | 2,577,049 | 2,382,518 | 89.6 | 2,659,189 | 8.6 | 10.6 |
| 4  |                                                                   | d. 4                       | 1,863,131 | 79.4 | 2,346,986 | 2,199,123 | 87.9 | 2,503,068 | 2,244,028 | 88.3 | 2,540,744 | 8.9 | 11.2 |
| 5  |                                                                   | e. Highest deprivation (5) | 1,908,536 | 76.7 | 2,486,943 | 2,222,060 | 85.9 | 2,586,465 | 2,252,562 | 86.4 | 2,607,762 | 9.7 | 12.7 |
| 6  |                                                                   |                            |           |      |           |           |      |           |           |      |           |     |      |
| 7  | <b>ED visit in last 2 years</b>                                   | Yes                        | 3,760,038 | 85.4 | 4,403,177 | 4,397,211 | 91.5 | 4,805,605 | 4,708,543 | 92.1 | 5,113,652 | 6.7 | 7.5  |
| 8  |                                                                   |                            |           |      |           |           |      |           |           |      |           |     |      |
| 9  | <b>Hospitalization in last 2 years</b>                            | Yes                        | 2,338,830 | 88.5 | 2,642,562 | 2,551,439 | 93.8 | 2,719,265 | 4,708,543 | 92.1 | 2,761,144 | 3.6 | 4.1  |
| 10 |                                                                   |                            |           |      |           |           |      |           |           |      |           |     |      |

Confidential

1  
2  
3  
4  
5  
6  
7  
8  
9  
10  
11  
12  
13  
14  
15  
16  
17  
18  
19  
20  
21  
22  
23  
24  
25  
26  
27  
28  
29  
30  
31  
32  
33  
34  
35  
36  
37  
38  
39  
40  
41  
42  
43  
44  
45  
46  
47

**Table 2. Univariate logistic regression models for association between patient characteristics and patient attachment 2018, stratified by sex**

| Variable                                     | Label                                    | Male                |           | Female              |           |
|----------------------------------------------|------------------------------------------|---------------------|-----------|---------------------|-----------|
|                                              |                                          | Odds Ratio (95% CI) | Prob      | Odds Ratio (95% CI) | Prob      |
| <b>Age category</b>                          | <19                                      | 1.99 (1.97, 2.01)   | <.0001    | 1.41 (1.40, 1.42)   | <.0001    |
|                                              | 19-34                                    | 0.57 (0.57, 0.57)   | <.0001    | 0.64 (0.63, 0.64)   | <.0001    |
|                                              | 35-49                                    | 0.71 (0.70, 0.71)   | <.0001    | 0.83 (0.82, 0.84)   | <.0001    |
|                                              | <i>50-64 (ref)</i>                       | <i>1.00</i>         | <i>--</i> | <i>1.00</i>         | <i>--</i> |
|                                              | 65-79                                    | 1.45 (1.44, 1.47)   | <.0001    | 1.16 (1.15, 1.17)   | <.0001    |
|                                              | 80+                                      | 1.54 (1.52, 1.57)   | <.0001    | 1.10 (1.08, 1.11)   | <.0001    |
| <b>RIO index</b>                             | Urban (0-9)                              | 1.08 (1.07, 1.09)   | <.0001    | 1.07 (1.06, 1.08)   | <.0001    |
|                                              | Small town (10-39)                       | 1.33 (1.32, 1.34)   | <.0001    | 1.44 (1.42, 1.45)   | <.0001    |
|                                              | <i>Rural (40+) (ref)</i>                 | <i>1.00</i>         | <i>--</i> | <i>1.00</i>         | <i>--</i> |
| <b>Comorbidity (ADG)</b>                     | <i>No/low comorbidity (0-4) (ref)</i>    | <i>1.00</i>         | <i>--</i> | <i>1.00</i>         | <i>--</i> |
|                                              | Moderate comorbidity (5-9)               | 3.33 (3.31, 3.35)   | <.0001    | 3.03 (3.01, 3.05)   | <.0001    |
|                                              | High comorbidity (10+)                   | 3.28 (3.24, 3.32)   | <.0001    | 2.89 (2.86, 2.92)   | <.0001    |
| <b>Morbidity (RUB)</b>                       | <i>Non-user/healthy user (0-1) (ref)</i> | <i>1.00</i>         | <i>--</i> | <i>1.00</i>         | <i>--</i> |
|                                              | Low comorbidity (2)                      | 4.38 (4.36, 4.41)   | <.0001    | 5.85 (5.80, 5.89)   | <.0001    |
|                                              | Moderate morbidity (3)                   | 6.51 (6.47, 6.54)   | <.0001    | 7.67 (7.62, 7.71)   | <.0001    |
|                                              | High morbidity (4+)                      | 7.13 (7.07, 7.19)   | <.0001    | 7.64 (7.58, 7.71)   | <.0001    |
| <b>Recent immigrant</b>                      | <i>No (ref)</i>                          | <i>1.00</i>         | <i>--</i> | <i>1.00</i>         | <i>--</i> |
|                                              | Yes                                      | 0.56 (0.56, 0.56)   | <.0001    | 0.50 (0.50, 0.51)   | <.0001    |
| <b>Marginalization: Instability quintile</b> | <i>[1] Lowest instability (ref)</i>      | <i>1.00</i>         | <i>--</i> | <i>1.00</i>         | <i>--</i> |

|                                                      |                                     |                   |           |                   |           |
|------------------------------------------------------|-------------------------------------|-------------------|-----------|-------------------|-----------|
|                                                      | [2]                                 | 0.90 (0.89, 0.91) | <.0001    | 0.95 (0.94, 0.96) | <.0001    |
|                                                      | [3]                                 | 0.82 (0.82, 0.83) | <.0001    | 0.89 (0.88, 0.89) | <.0001    |
|                                                      | [4]                                 | 0.70 (0.70, 0.71) | <.0001    | 0.77 (0.77, 0.78) | <.0001    |
|                                                      | [5] Highest instability             | 0.53 (0.53, 0.54) | <.0001    | 0.59 (0.58, 0.59) | <.0001    |
|                                                      |                                     |                   |           |                   |           |
| <b>Marginalization:<br/>Deprivation<br/>quintile</b> | <i>[1] Lowest deprivation (ref)</i> | <i>1.00</i>       | <i>--</i> | <i>1.00</i>       | <i>--</i> |
|                                                      | [2]                                 | 1.01 (1.00, 1.01) | 0.0377    | 1.03 (1.02, 1.03) | <.0001    |
|                                                      | [3]                                 | 0.90 (0.90, 0.91) | <.0001    | 0.94 (0.93, 0.94) | <.0001    |
|                                                      | [4]                                 | 0.78 (0.78, 0.79) | <.0001    | 0.83 (0.82, 0.84) | <.0001    |
|                                                      | [5] Highest deprivation             | 0.65 (0.64, 0.65) | <.0001    | 0.71 (0.71, 0.72) | <.0001    |

Confidential

**Table 3. Multivariate logistic regression for association between patient characteristics and patient attachment, 2018**

| Variable                              | Label                                    | Male:<br>Odds Ratio<br>(95% CI) | Male: Prob | Female:<br>Odds Ratio<br>(95% CI) | Female:<br>Prob |
|---------------------------------------|------------------------------------------|---------------------------------|------------|-----------------------------------|-----------------|
| INTERCEPT                             |                                          | 2.23 (2.20, 2.26)               | <.0001     | 2.39 (2.35, 2.43)                 | <.0001          |
| Age category                          | a. <19 vs 50-64                          | 2.70 (2.67, 2.73)               | <.0001     | 2.40 (2.37, 2.43)                 | <.0001          |
|                                       | b. 19-34 vs 50-64                        | 0.86 (0.86, 0.87)               | <.0001     | 0.83 (0.83, 0.84)                 | <.0001          |
|                                       | c. 35-49 vs 50-64                        | 0.92 (0.91, 0.92)               | <.0001     | 1.01 (1.00, 1.02)                 | 0.0027          |
|                                       | d. 65-79 vs 50-64                        | 1.13 (1.12, 1.14)               | <.0001     | 1.00 (0.99, 1.01)                 | 0.4717          |
|                                       | e. 80+ vs 50-64                          | 1.14 (1.13, 1.16)               | <.0001     | 0.91 (0.90, 0.92)                 | <.0001          |
| RIO index                             | a. Urban vs Rural                        | 1.11 (1.10, 1.12)               | <.0001     | 1.11 (1.09, 1.12)                 | <.0001          |
|                                       | b. Small town vs Rural                   | 1.28 (1.27, 1.30)               | <.0001     | 1.35 (1.33, 1.37)                 | <.0001          |
| Comorbidity (ADG)                     | a. Moderate vs Low comorbidity           | 1.41 (1.40, 1.42)               | <.0001     | 1.33 (1.31, 1.34)                 | <.0001          |
|                                       | b. High vs Low comorbidity               | 1.58 (1.56, 1.61)               | <.0001     | 1.36 (1.34, 1.38)                 | <.0001          |
| Resource user band (RUB)              | a. Low user vs Non-user                  | 3.90 (3.87, 3.93)               | <.0001     | 5.43 (5.38, 5.48)                 | <.0001          |
|                                       | b. Moderate user vs Non-user             | 5.32 (5.28, 5.36)               | <.0001     | 6.95 (6.89, 7.01)                 | <.0001          |
|                                       | c. High user vs Non-user                 | 4.82 (4.76, 4.89)               | <.0001     | 7.07 (6.98, 7.16)                 | <.0001          |
| Recent immigrant                      | a. Immigrant vs non-immigrant            | 0.63 (0.63, 0.64)               | <.0001     | 0.60 (0.59, 0.60)                 | <.0001          |
| Marginalization: Instability quintile | a. [2] vs Lowest instability [1]         | 0.93 (0.92, 0.94)               | <.0001     | 0.94 (0.93, 0.95)                 | <.0001          |
|                                       | b. [3 vs Lowest instability [1]          | 0.88 (0.88, 0.89)               | <.0001     | 0.91 (0.90, 0.92)                 | <.0001          |
|                                       | c. [4] vs Lowest instability [1]         | 0.81 (0.81, 0.82)               | <.0001     | 0.84 (0.83, 0.85)                 | <.0001          |
|                                       | d. Highest [5] vs Lowest instability [1] | 0.67 (0.67, 0.68)               | <.0001     | 0.72 (0.71, 0.73)                 | <.0001          |

1  
2  
3  
4  
5  
6  
7  
8  
9  
10  
11  
12  
13  
14  
15  
16  
17  
18  
19  
20  
21  
22  
23  
24  
25  
26  
27  
28  
29  
30  
31  
32  
33  
34  
35  
36  
37  
38  
39  
40  
41  
42  
43  
44  
45  
46  
47  
48  
49  
50  
51  
52  
53  
54  
55  
56  
57  
58  
59  
60

|                                          |                                             |                   |        |                      |        |
|------------------------------------------|---------------------------------------------|-------------------|--------|----------------------|--------|
| Marginalization:<br>Deprivation quintile | a. [2] vs Lowest<br>deprivation [1]         | 0.98 (0.97, 0.99) | <.0001 | 0.98 (0.98,<br>0.99) | 0.0007 |
|                                          | b. [3] vs Lowest<br>deprivation [1]         | 0.92 (0.91, 0.93) | <.0001 | 0.93 (0.92,<br>0.94) | <.0001 |
|                                          | c. [4] vs Lowest<br>deprivation [1]         | 0.85 (0.84, 0.86) | <.0001 | 0.87 (0.86,<br>0.88) | <.0001 |
|                                          | d. Highest [5] vs Lowest<br>deprivation [1] | 0.75 (0.75, 0.76) | <.0001 | 0.80 (0.79,<br>0.80) | <.0001 |

Confidential



Figure 1 Proportion primary care patients attached 2008-2018

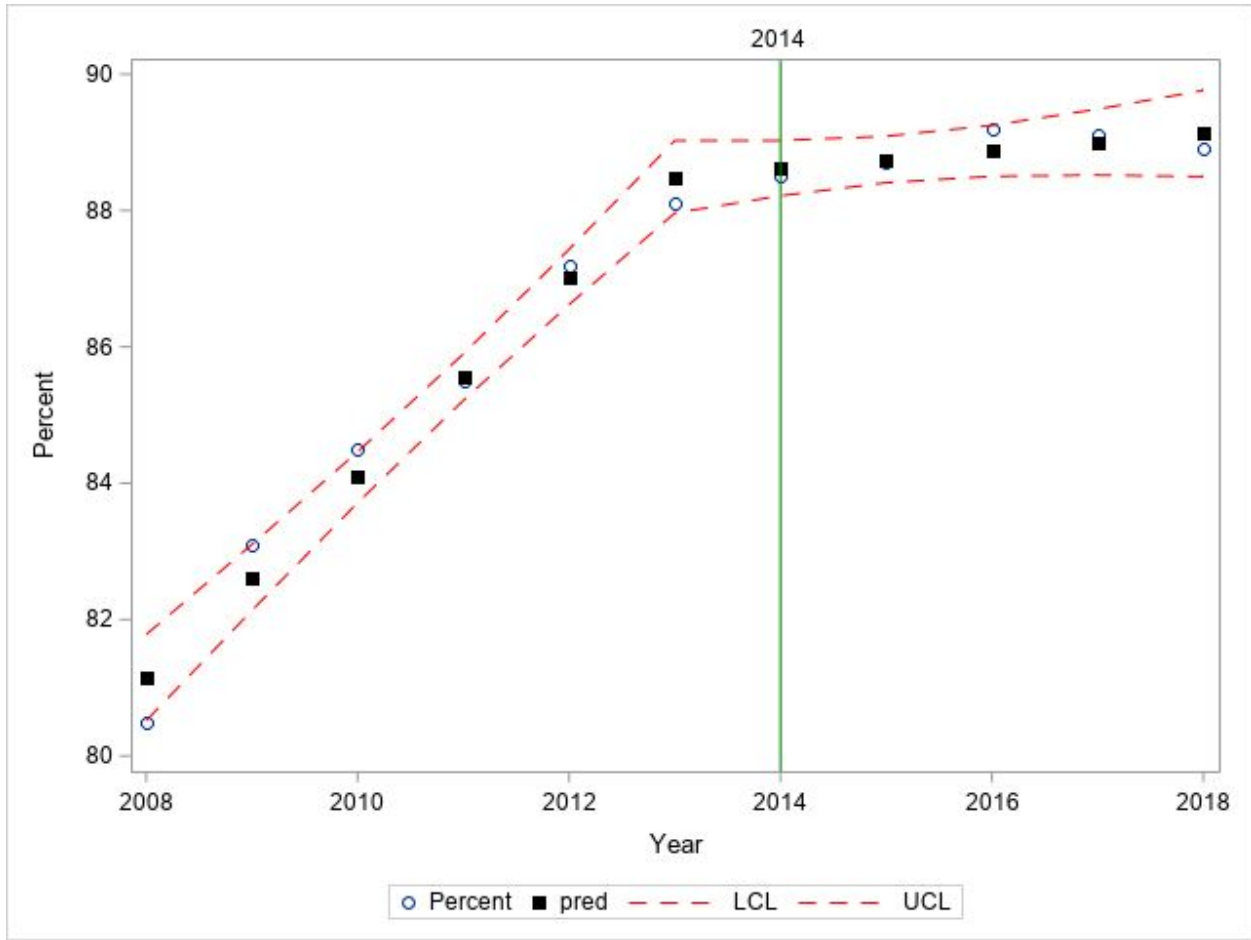

Figure 2. Proportion primary care patients attached 2008-2018 by selected patient characteristics

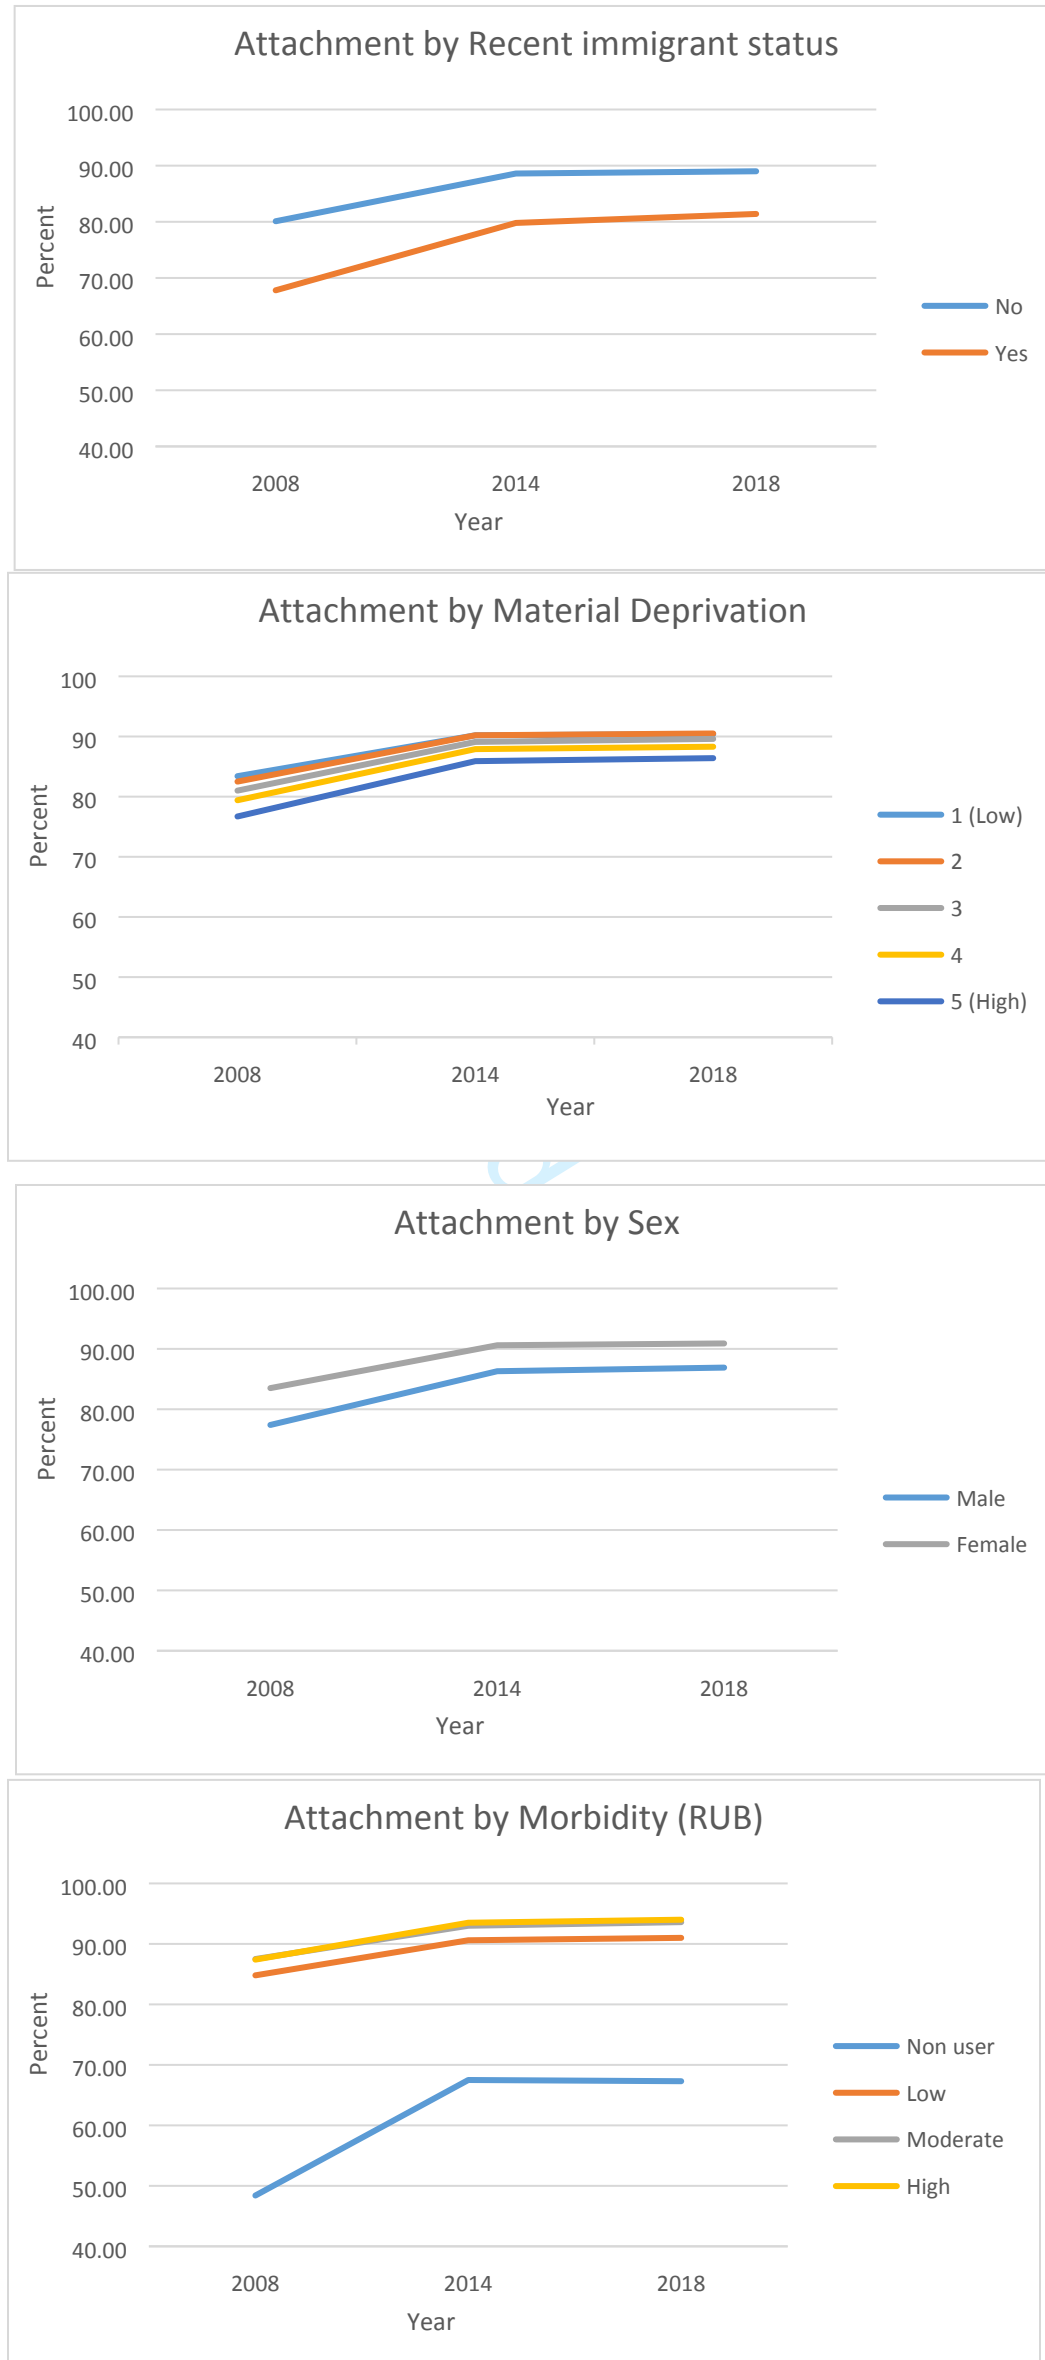

Supplement: open-2022-0167-original-submission.pdf [file open-2022-0167-original-submission.pdf]
