# Supplementary figures and images for: Trends in attachment to a primary care provider in Ontario, 2008–2018: an interrupted time-series analysis
Source: PubMed Central journal article supplement — CMAJ Open. 2023 Sep 5;11(5):E809–19. doi: 10.9778/cmajo.20220167 (PMC10482493; doi:10.9778/cmajo.20220167), 2023-09-05

## Flowchart of Patient Attachment, 2018

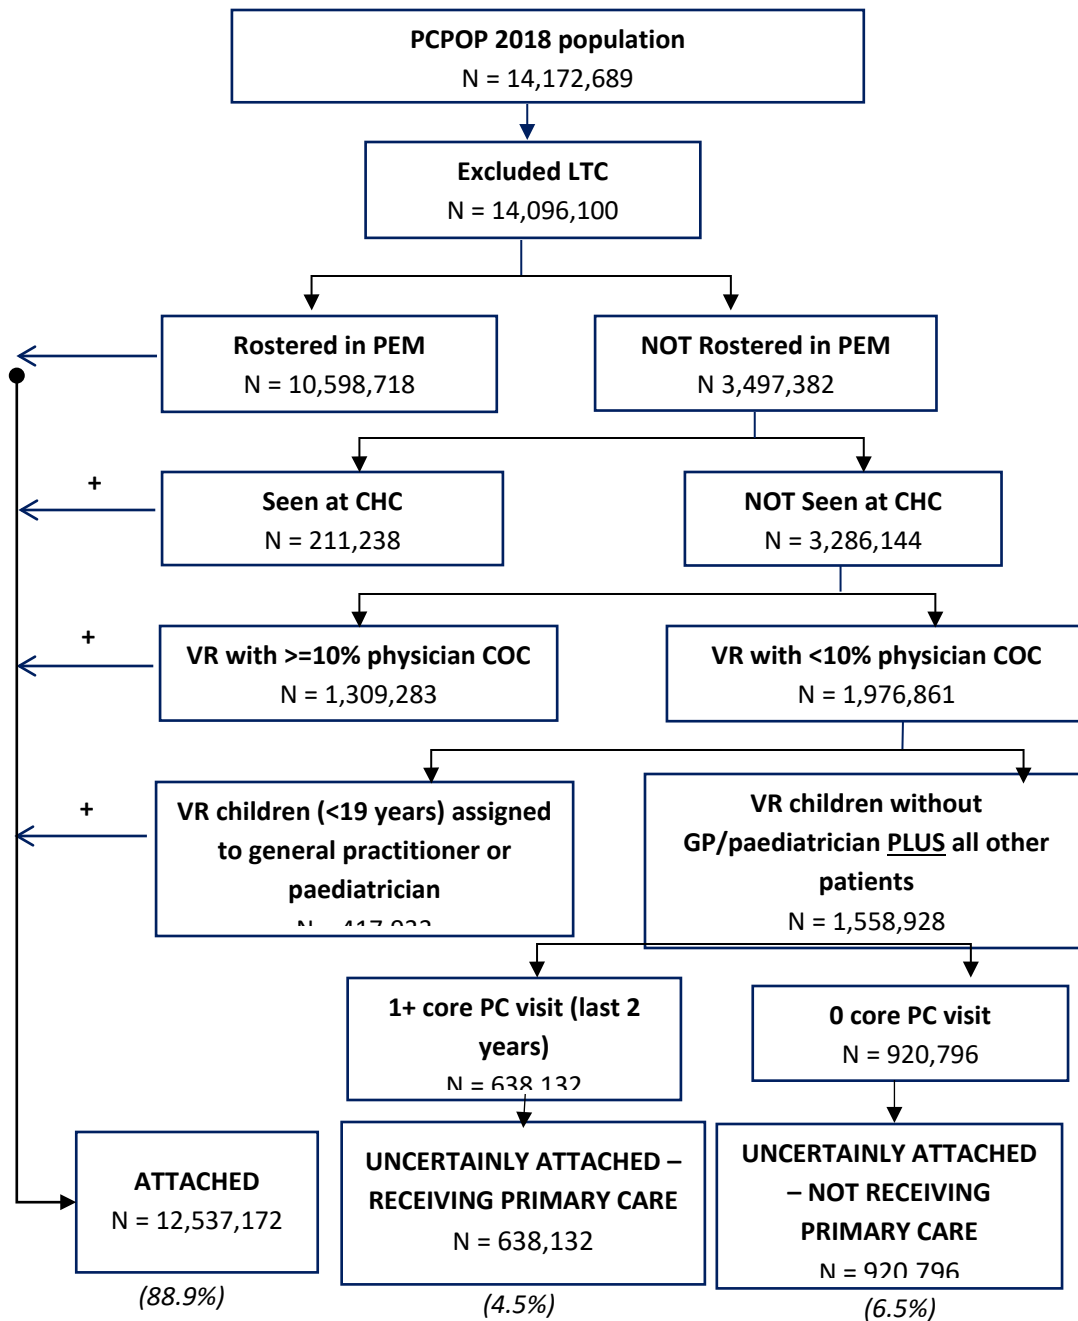

Supplement: open-2022-0167-2-at.pdf [file open-2022-0167-2-at.pdf]
